# Supplementary material for: Cu-P@silica-CNT-based catalyst for effective electrolytic water splitting in an alkaline medium with hydrazine assistance
Source: Royal Society of Chemistry journal article supplement (doi:10.1039/d4ra03998j), 2024-01-01
Supplement: d4ra03998j1.pdf [file d4ra03998j1.pdf]

## Supplements

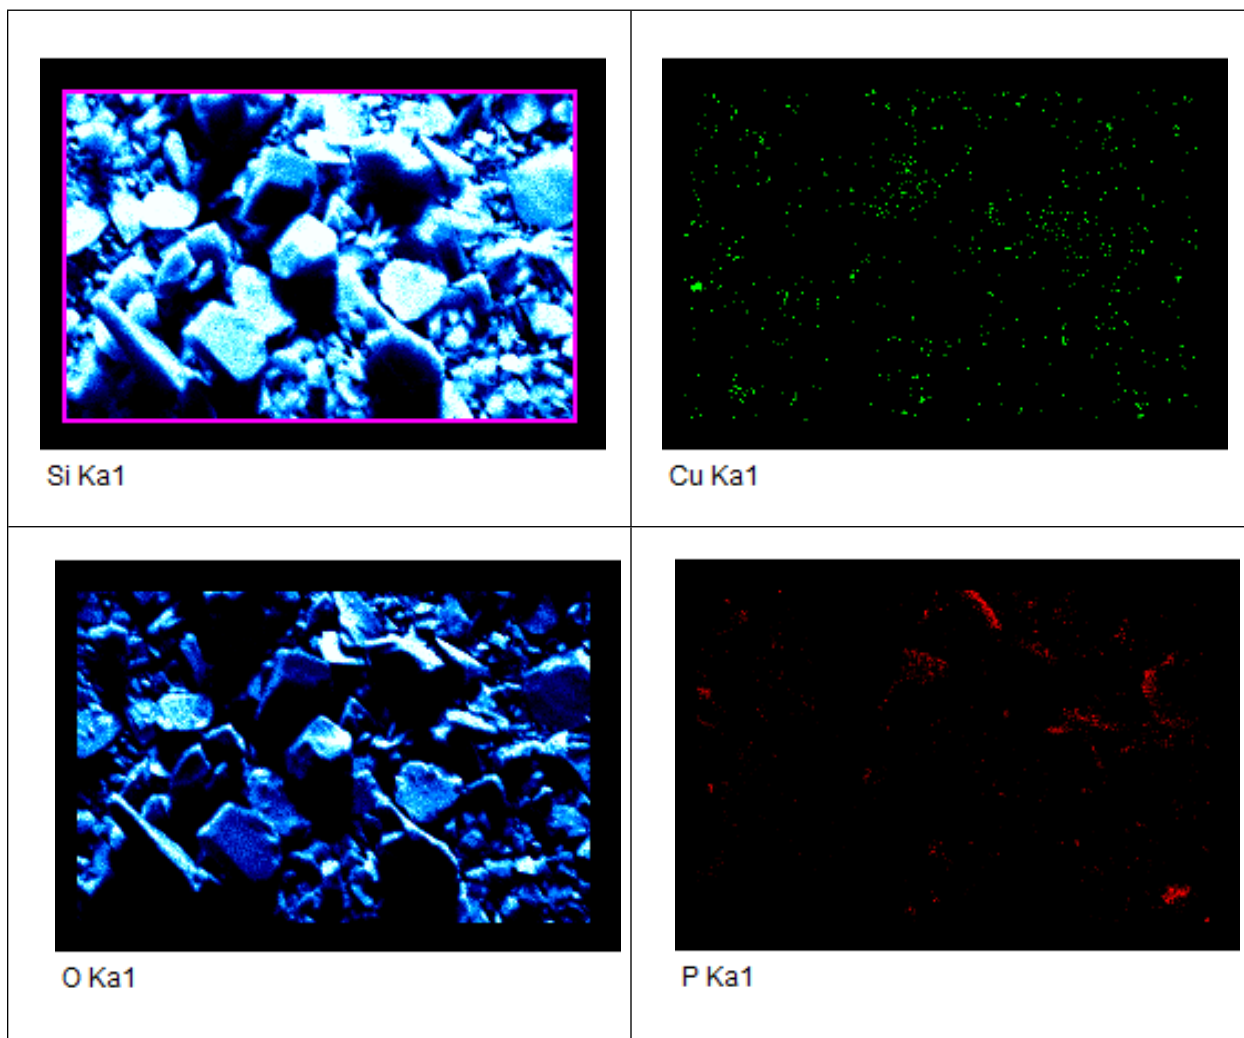

**Supplement 1a.** Surface elemental mapping of the AFS-Cu-P catalyst showing Si, O, Cu and P elements

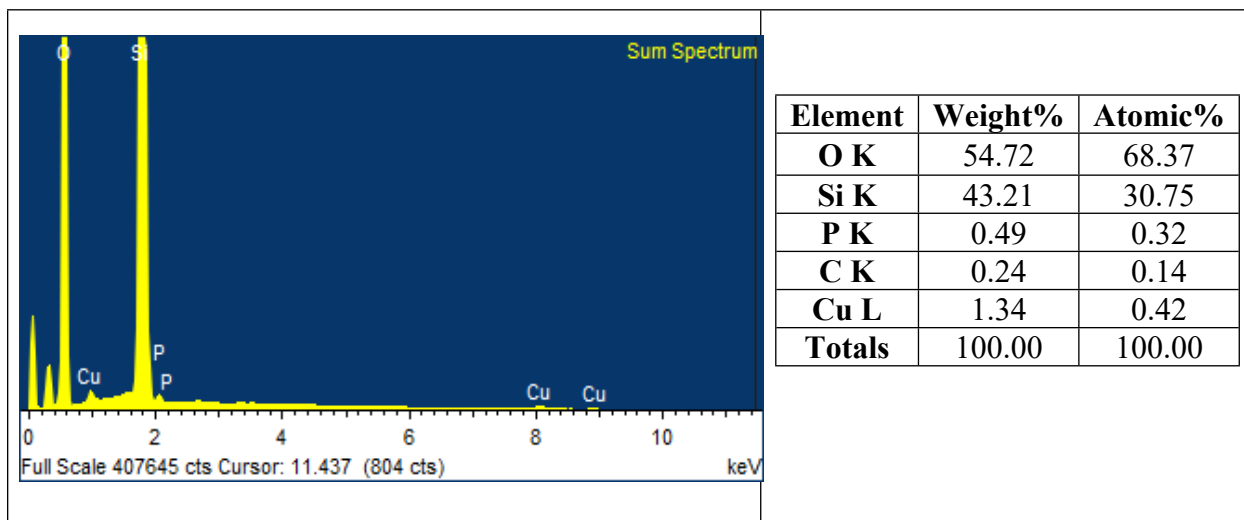

**Supplement 1b.** EDS data and elements percentage of the AFS-Cu-P catalyst components

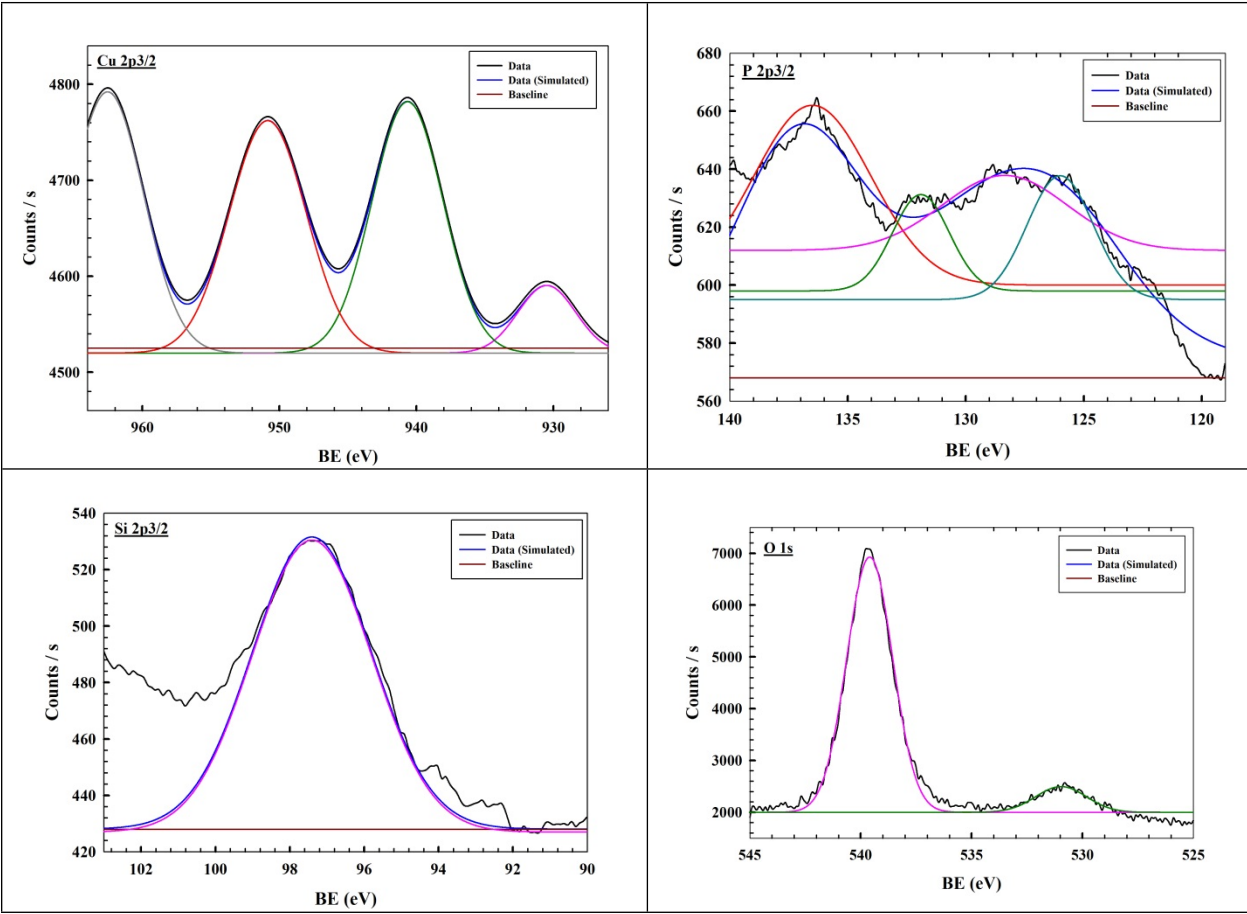

**Supplement 2.** XPS of copper, phosphorus, silicon and oxygen in the AFS-Cu-P catalyst

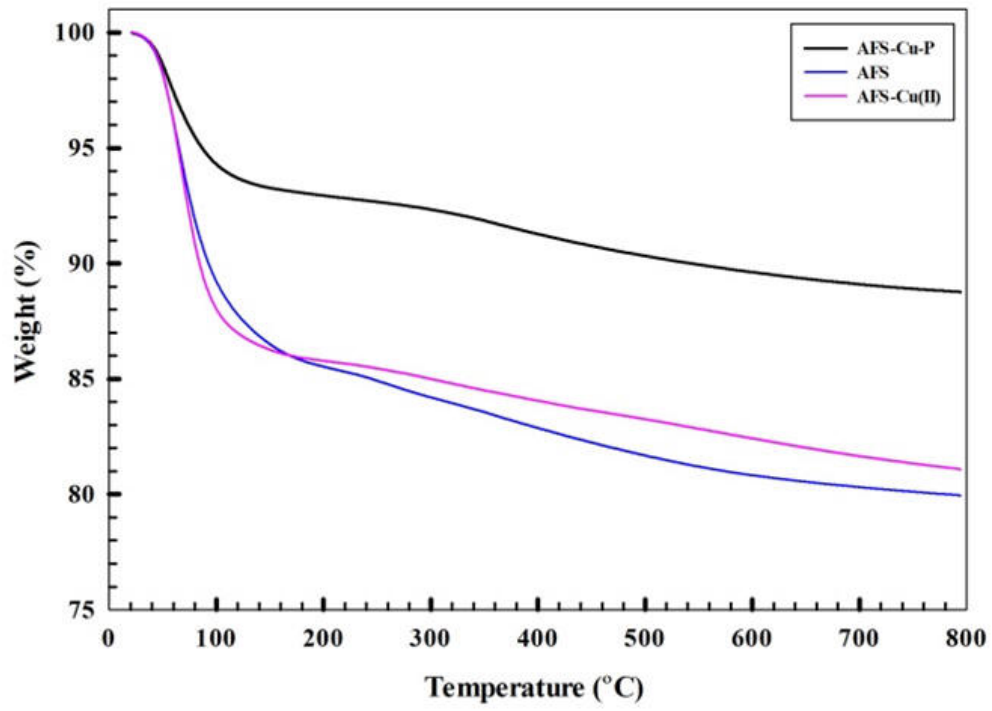

**Supplement 3.** TGA profile of the as-prepared AFS-Cu-P; Comparison with AFS-Cu(II) and AFS

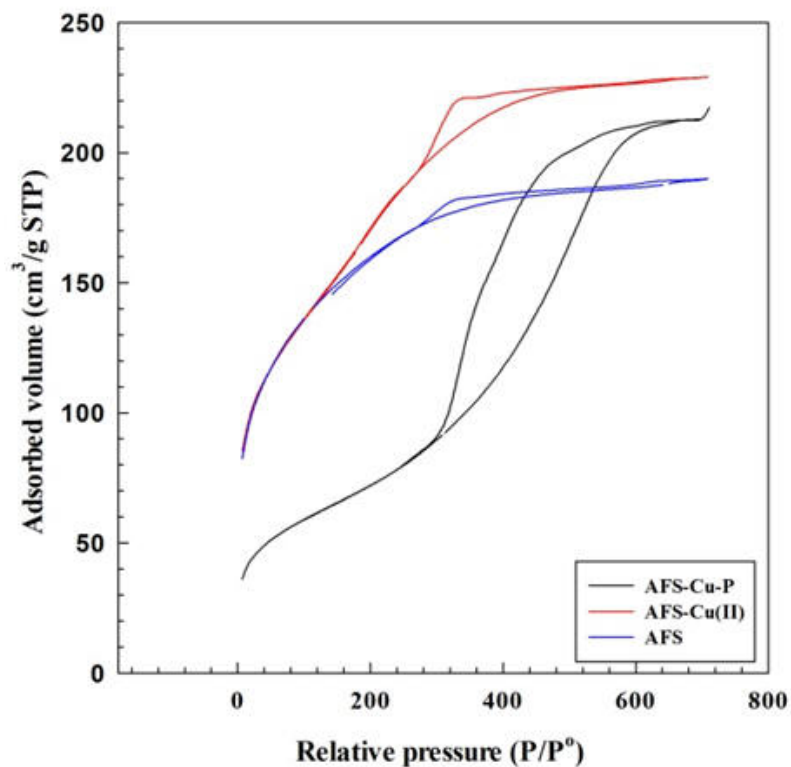

**Supplement 4a.** BET isotherm for the as-prepared AFS-Cu-P catalyst and the AFS-Cu(II)

**Supplement 4b.** Summary of the BET results for AFS-Cu-P catalyst, AFS-Cu(II), and AFS

|                                                    | <b>AFS</b> | <b>AFS-Cu(II)</b> | <b>AFS@100 Phos-Cu</b> |
|----------------------------------------------------|------------|-------------------|------------------------|
| <b>BET Surface Area<br/>(m<sup>2</sup>/g)</b>      | 525.32     | 546.15            | 232.38                 |
| <b>Langmuir Surface Area<br/>(m<sup>2</sup>/g)</b> | 769.18     | 808.38            | 341.53                 |
| <b>Pore Volume<br/>cm<sup>3</sup>/g</b>            | 0.29399    | 0.35393           | 0.32922                |

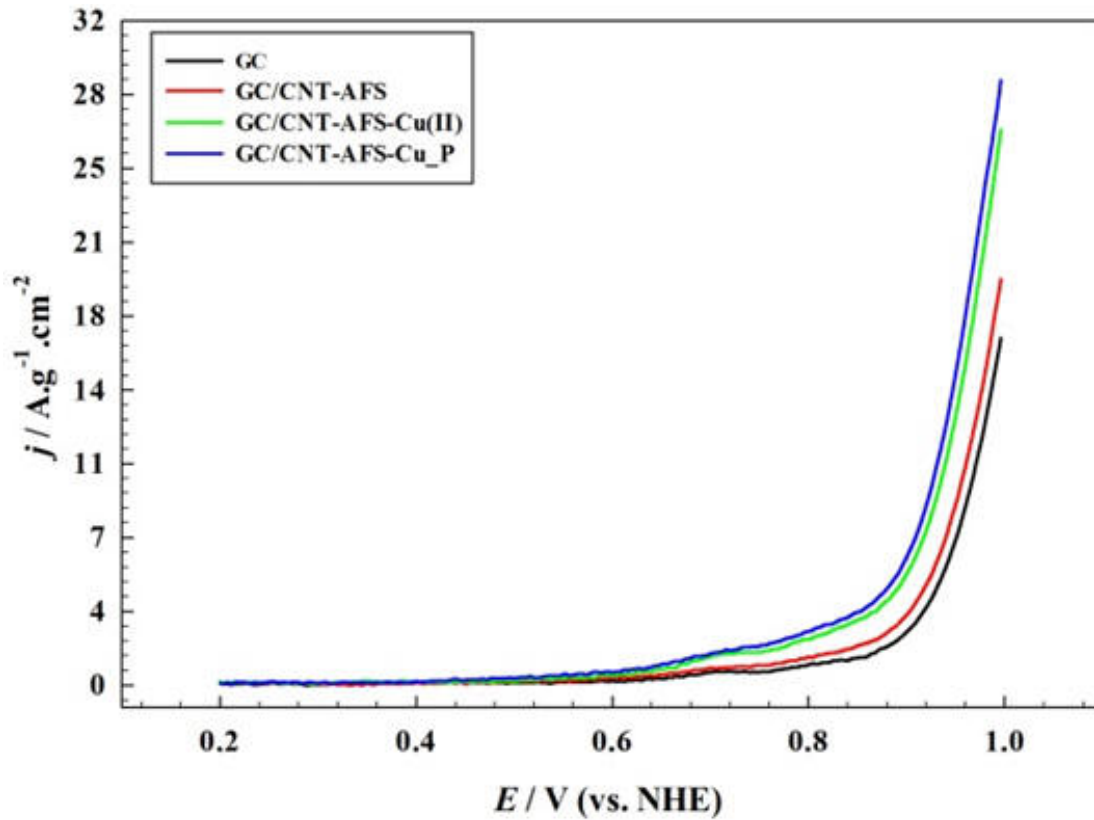

**Supplement 5.** Comparison of the linear sweep voltammograms of the GC/CNT-AFS-Cu-P, GC/CNT-AFS-Cu(II) and GC/CNT-AFS electrodes in 1.0 M KOH

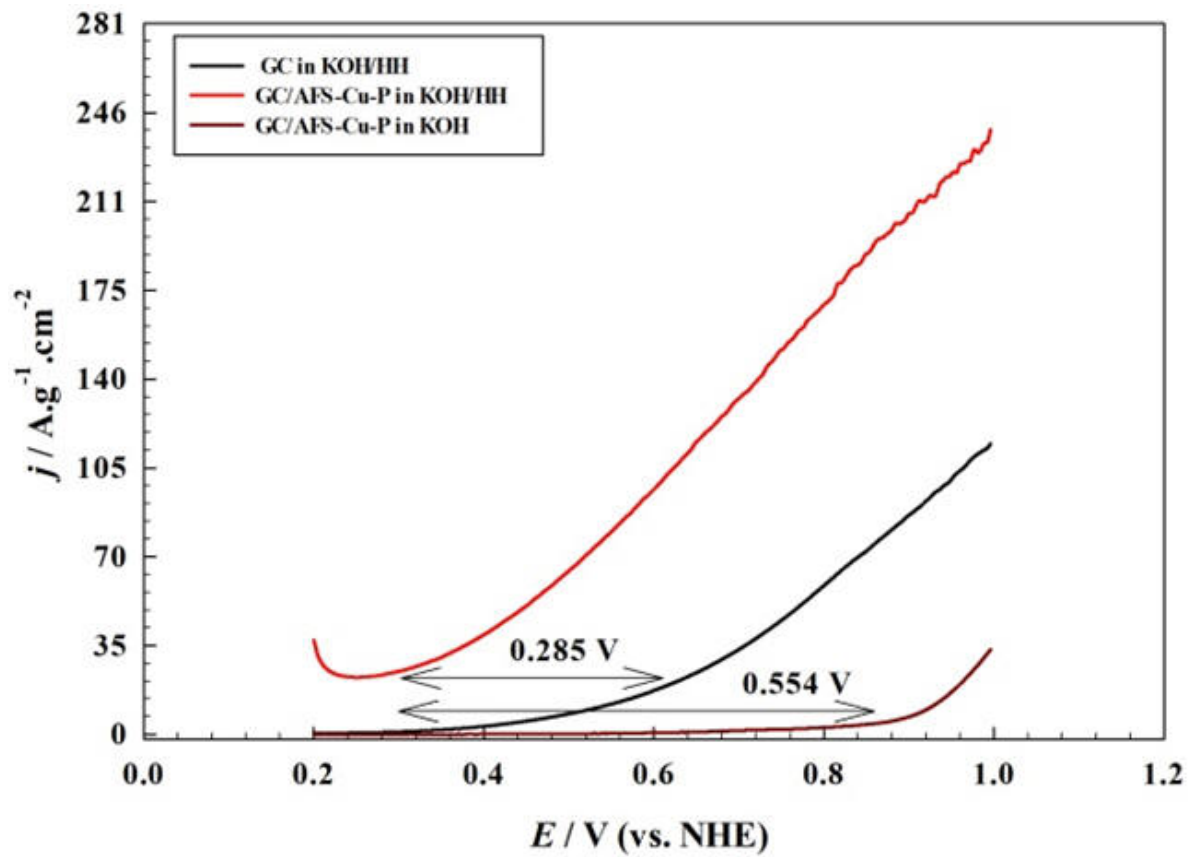

**Supplement 6.** Comparison of the linear sweep voltammograms of the GC/CNT-AFS-Cu-P electrode in presence and absence of hydrazine with GC in presence of hydrazine/1.0 M KOH

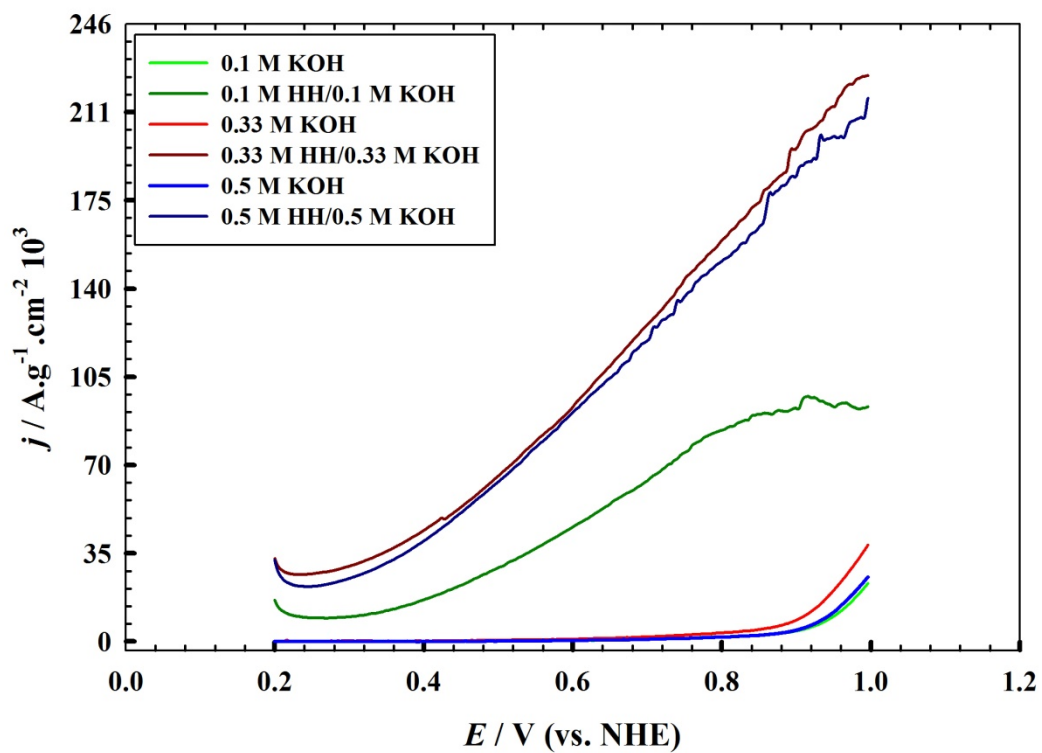

**Supplement 7.** Effect of hydrazine concentration on the oxygen evolution reaction at the GC/CNT-AFS-Cu-P electrode; the concentration ratio of hydrazine to KOH was kept constant. The scan rate is  $10 \text{ mV}\cdot\text{s}^{-1}$



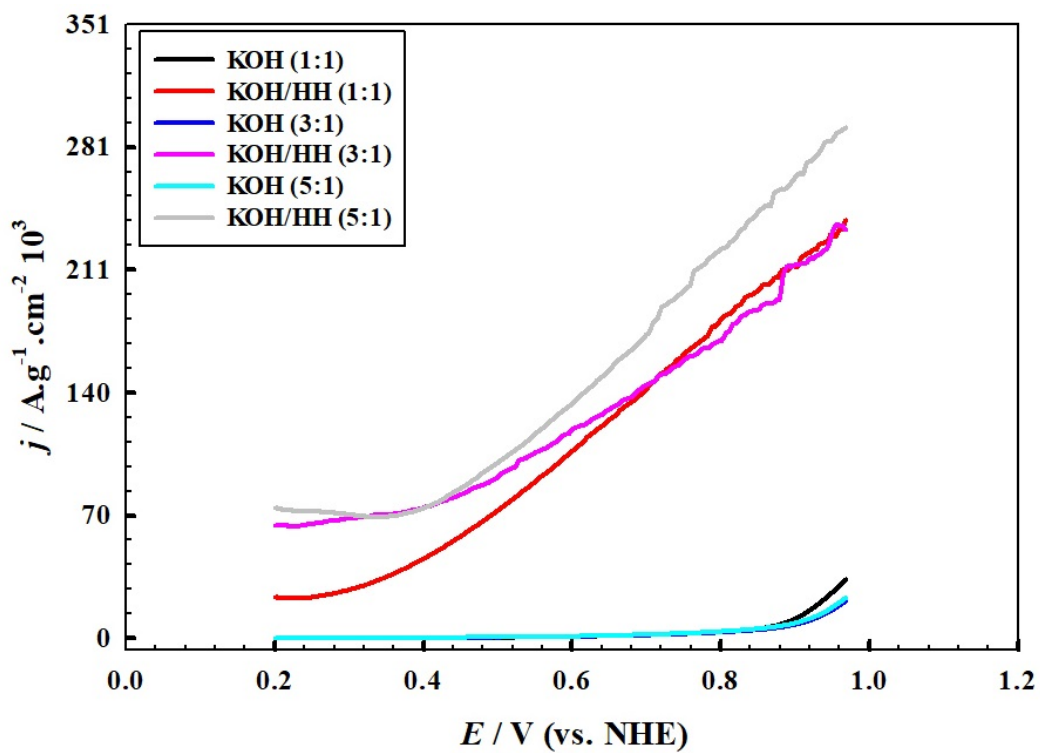

**Supplement 8.** Effect of KOH concentration on the oxygen evolution reaction at the GC/CNT-AFS-Cu-P electrode. The scan rate is  $10 \text{ mV}\cdot\text{s}^{-1}$ .

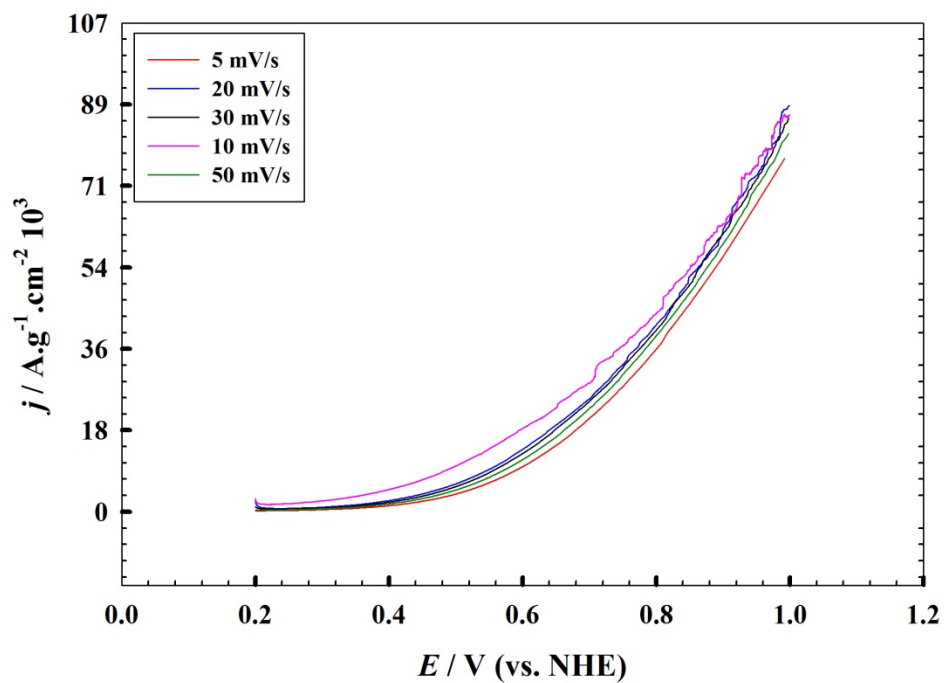

**Supplement 9.** Effect of varying the scan rate on the linear sweep voltammograms behavior of the electrode GC/CNT-AFS-Cu-P in 0.33 M hydrazine/ 1.0 M KOH.

| Electrode Material/Molecular Species                        | Molecular Species Oxidation Overpotential | OER Overpotential | Current Density/ Specific Current                  | Overpotential      |
|-------------------------------------------------------------|-------------------------------------------|-------------------|----------------------------------------------------|--------------------|
| Co <sub>0.52</sub> Cu <sub>0.48</sub> /Cu@S-C Hydrazine[89] | 118 mV                                    | 1.3 V             | 10, 100 and 200 mA.cm <sup>-2</sup>                | 36, 210 and 282 mV |
| D/Ni-Cu-Se/NF Urea[90]                                      | 1.335 V                                   | 1.395 V           | 10 mA cm <sup>-2</sup>                             | 1.335 V            |
| RuCo/C Hydrazine[91]                                        | 76.8 mV                                   | -                 | 100 mA·cm <sup>-2</sup>                            | 215.4 mV           |
| Pd/NiCo <sub>2</sub> O <sub>4</sub> Hydrazine[92]           | 6 mV                                      | -                 | 10 and 100 mA.cm <sup>-2</sup>                     | 0.35 V and 0.94 V  |
| Co PANI/C Hydrazine[93]                                     | 0.34 V                                    | 0.906 V           | -                                                  | -                  |
| Mn-doped Ni <sub>2</sub> P Hydrazine[94]                    | 55 mV                                     | 0.5 V             | 10 mA.cm <sup>2</sup>                              | 55 mV              |
| Cu <sub>2</sub> O-S-Co-CoFe Hydrazine[95]                   | 0.343 V                                   | 307 mV            | 20 mA.cm <sup>-2</sup>                             | 0.36 V             |
| Cu-CoFe/Co/NC[96]                                           | 281 mV                                    | 0.87 V            | 10 mA.cm <sup>2</sup>                              | 281 mV             |
| RuNi Hydrazine[97]                                          | 65 mV                                     | -                 | 10 mA.cm <sup>-2</sup> and 100 mA.cm <sup>-2</sup> | 57.8 mV and 327 mV |
| CNT-AFS-Cu-P Hydrazine ( <b>this work</b> )                 | 186 mV                                    | 298 mV            | 32 A.g <sup>-1</sup> .cm <sup>-2</sup>             | 298 mV             |

**Supplement 10.** Comparison of the performance of the present catalyst to copper- and others-based catalysts with some figures of merit.

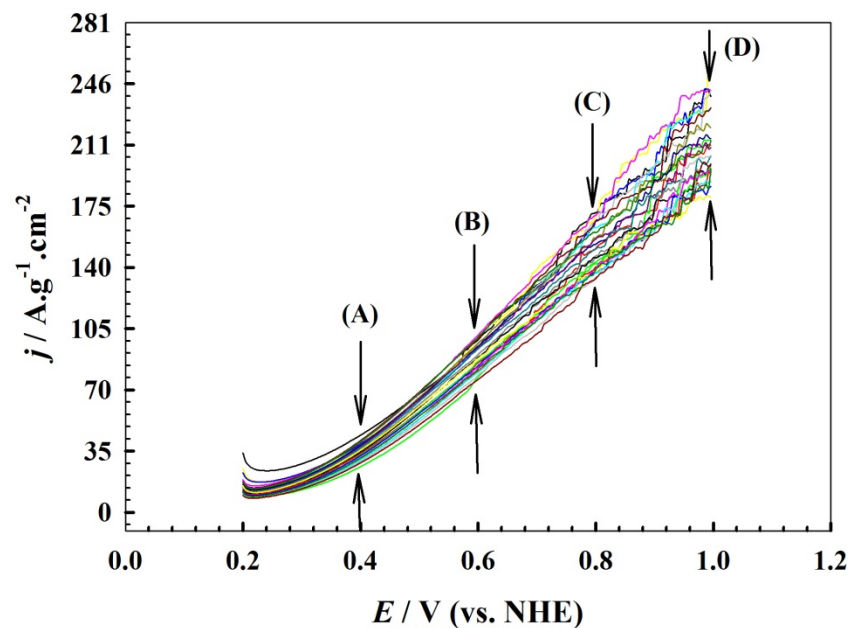

**Supplement 11a.** Repeated linear sweep voltammograms (LSVs) of the GC/ CNT-AFS-Cu-P electrode in 0.50 M KOH in the presence of 0.33 M hydrazine with a scan rate of 10 mV.s<sup>-1</sup>.

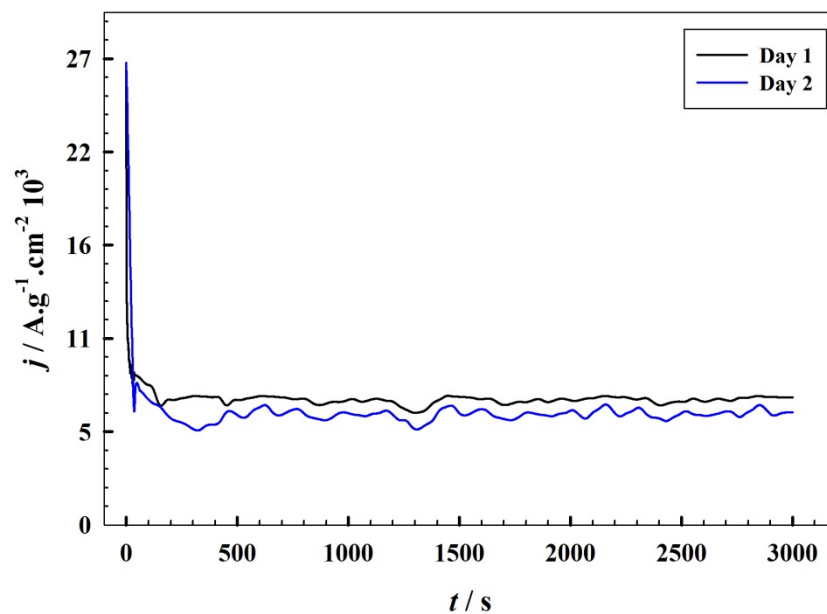

**Supplement 11b.** Chronoamperometry of the GC/ CNT-AFS-Cu-P electrode exposed constant applied potential of 0.05 V in 0.33 M hydrazine/1.0 M KOH for an extended time of one hour.
